# Supplementary material for: A multi-ethnic polygenic risk score for chronic kidney disease is associated with increased risk of hypertension in African American individuals
Source: Research Square preprint supplement (doi:10.21203/rs.3.rs-6674221/v1), 2025-06-24
Supplement: Supplementary file 1 [file dcd0de92748513b069b823f8.docx]

A multi-ethnic polygenic risk score for chronic kidney disease is associated with increased risk of hypertension in African American individuals

**Supplementary Information**

**Contents**

[Study population 2](#_Toc177723817)

[Previously Published PRS for CKD, SBP, and DBP 2](#_Toc177723818)

[Supplementary Figures 3](#_Toc177723819)

[Figure S1. Participant selection 3](#_Toc177723820)

[Figure S2: Distribution of 3 PRS scores 4](#_Toc177723821)

[Figure S3: AUC plots for CKD status with combined PRS 5](#_Toc177723822)

[Figure S4: AUC plots for HT status with combined PRS 6](#_Toc177723823)

[Figure S5: Pairwise scatterplot between SBP-, DBP-, and CKD-PRS 7](#_Toc177723824)

[Supplementary Tables 8](#_Toc177723825)

[Table S1. Baseline characteristics stratified by HT 8](#_Toc177723826)

[Table S2. Deciles of CKD-PRS with CKD 10](#_Toc177723827)

[Table S3. Deciles of CKD-PRS with HT 11](#_Toc177723828)

[Table S4. Deciles of CKD-PRS with SBP 12](#_Toc177723829)

[Table S5. Deciles of CKD-PRS with DBP 13](#_Toc177723830)

[Table S6. Deciles of SBP-PRS with CKD 14](#_Toc177723831)

[Table S7. Deciles of SBP-PRS with HT 15](#_Toc177723832)

[Table S8. Deciles of SBP-PRS with SBP 16](#_Toc177723833)

[Table S9. Deciles of SBP-PRS with DBP 17](#_Toc177723834)

[Table S10. Deciles of DBP-PRS with CKD 18](#_Toc177723835)

[Table S11. Deciles of DBP-PRS with HT 19](#_Toc177723836)

[Table S12. Deciles of DBP-PRS with SBP 20](#_Toc177723837)

[Table S13. Deciles of DBP-PRS with DBP 21](#_Toc177723838)

[Table S14. Associations of PRS with CKD outcome in JHS with AUC 22](#_Toc177723839)

[Table S15. Associations of PRS with HT outcome in JHS with AUC 23](#_Toc177723840)

[Table S16. Associations of PRS with SBP outcome in JHS with R-squared 24](#_Toc177723841)

[Table S17. Associations of PRS with DBP outcome in JHS with R-squared 25](#_Toc177723842)

# Study population

All JHS participants gave verbal and written informed consent. The JHS design, methods,1 the study design for genetic analysis,2 physical activity assessment methods3 as well as sociocultural methods4 have been published previously. The JHS study protocol was approved by the JHS institutional review boards of Jackson State University, Tougaloo College, and the University of Mississippi Medical Center.

# Previously Published PRS for CKD, SBP, and DBP

The SNPs for CKD-PRS were selected from a published GWAS study, conducted by Khan et al, in the Chronic Kidney Disease Genetics (CKDGen) Consortium. This meta-analysis study included 765,348 multi-ethnic individuals where 2% of the population was AA.5 A PRS was then developed and trained in 177,208 participants (6,573 cases and 170,635 controls) from the UK Biobank Study and subsequently evaluated in an independent multi-ancestry population. The final PRS was obtained using the pruning and thresholding (P+T) approach using R2 and p-value inclusion thresholds of 0.2 and 0.03, respectively and consisted of 471,316 variants, 41,426 of which had nonzero weights.6 The CKD-PRS is included in the PGS catalog (PGS002237).

The SNPs for SBP-PRS and DBP-PRS were selected from a recent GWAS study for these traits that was conducted in 95,457 AA selected from the Million Veterans Program (MVP; N=66,079) and the Continental Origins and Genetic Epidemiology Network (COGENT; N=29,378) consortium.7 MVP is a large electronic health records study which was established in 2011 to determine how genetic variation influences the health of US military veterans. The COGENT consortium consists of 19 studies with GWAS level data, including JHS. While JHS was included in this GWAS, it represented only 2% (N=2,017) of the total sample size. The SBP-PRS and DBP-PRS were constructed in a subset of AA participants of the BioVU biobank (based at Vanderbilt University) using the PRS-CS method with a p-value inclusion threshold of 0.1.8 The PRS were validated in African ancestry participants from the UK Biobank (N = 7,641). The final score included 104,823 and 103,234 variants for SBP and DBP respectively.

# Supplementary Figures

## Figure S1. Participant selection

**Initial Sample size:**

Participants with complete genotype and phenotype data for interested variants: 3021

8 participants removed due to missing sex inconsistencies, pedigree issues and duplicates

6 participants removed due to missing HT data

4 participants removed due to missing CKD data

8 participants removed due to missing PCA data

Sample size: 3013

**Final Sample size: 2995**

Sample size: 3007

Sample size: 3003

Figure S1. Participant selection for the study

## Figure S2: Distribution of 3 PRS scores


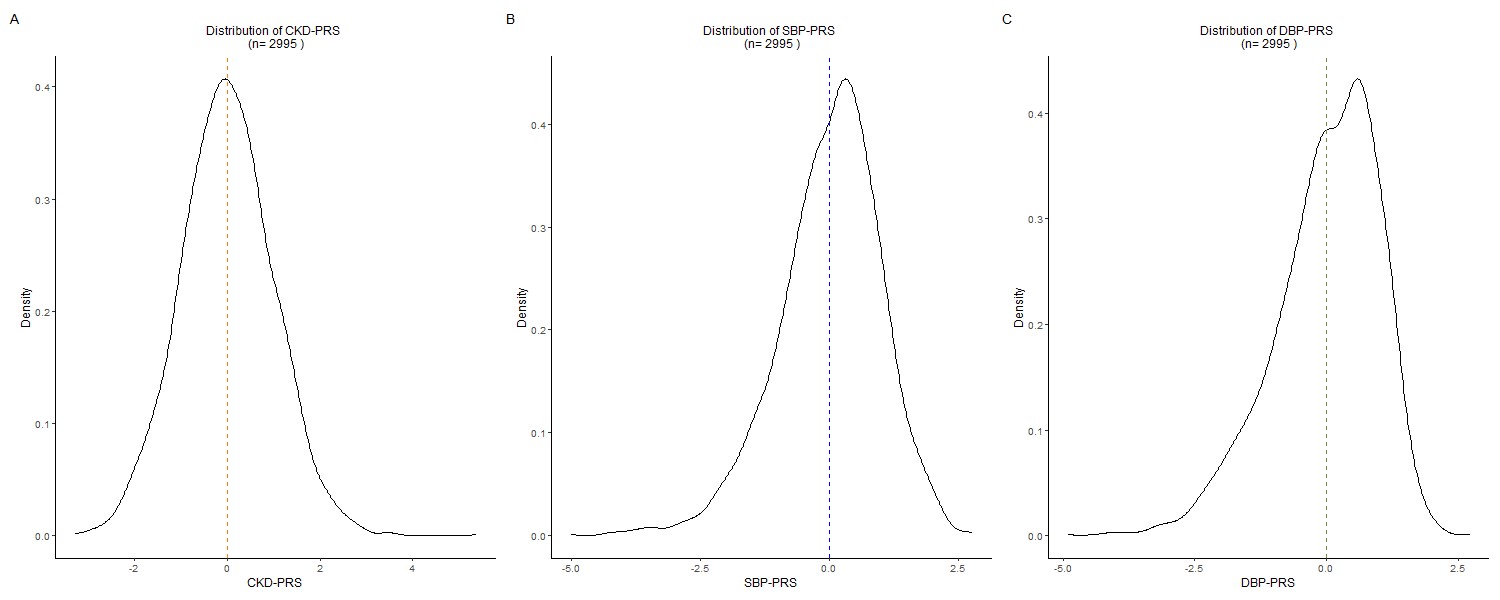


Figure S2. Standardized weighted polygenic risk score distribution in JHS (N=2,995). The vertical line represents the mean of each distribution. (A: Chronic kidney disease PRS, B: Systolic blood pressure PRS, C: Diastolic blood pressure PRS)

## Figure S3: AUC plots for CKD status with combined PRS


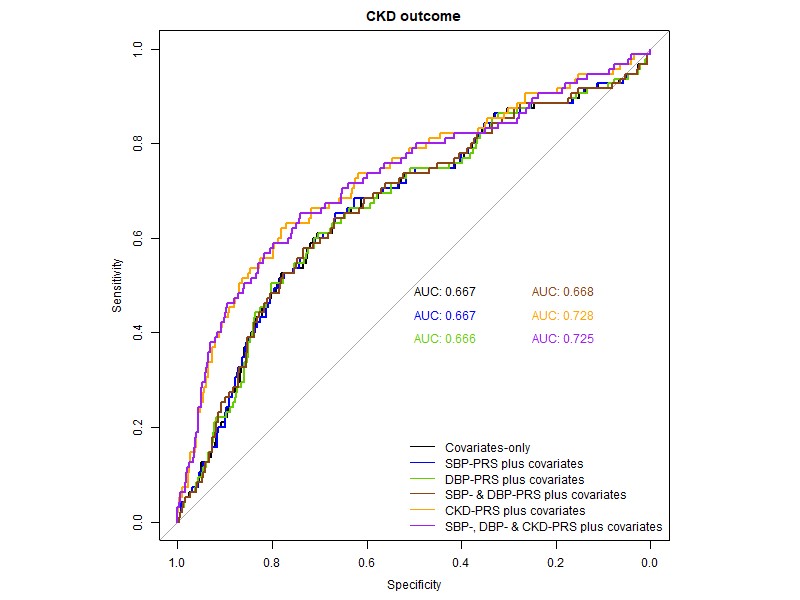


Figure S3. Area under the receiver operator curve for logistic model for CKD status in JHS participants as a function of (i) primary covariates (age, sex and 10PCs), (ii) weighted SBP-PRS plus covariates, (iii) weighted DBP-PRS plus covariates, (iv) weighted SBP- & DBP-PRS plus covariates, (v) weighted CKD-PRS plus covariates and, (vi) weighted SBP-, DBP- & CKD-PRS plus covariates.

## Figure S4: AUC plots for HT status with combined PRS


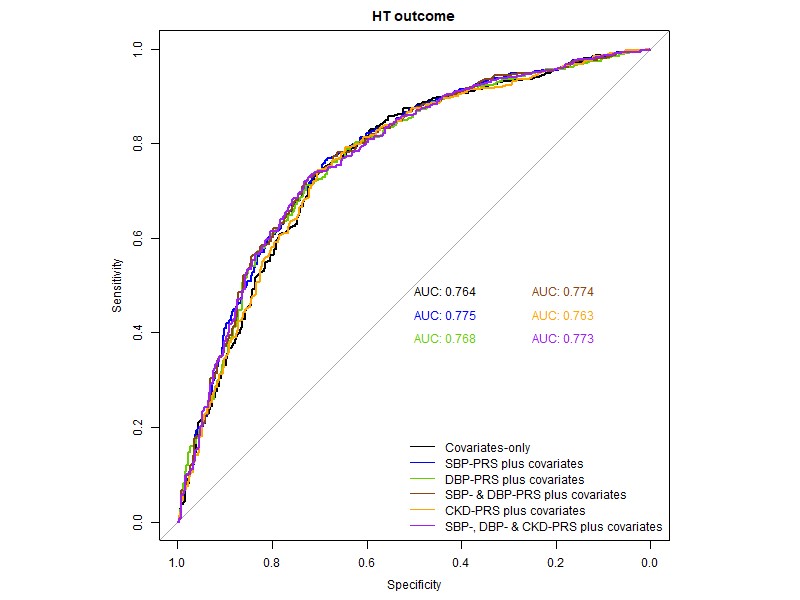


Figure S4. Area under the receiver operator curve for logistic model for HT status in JHS participants as a function of (i) primary covariates (age, sex and 10PCs), (ii) weighted SBP-PRS plus covariates, (iii) weighted DBP-PRS plus covariates, (iv) weighted SBP- & DBP-PRS plus covariates, (v) weighted CKD-PRS plus covariates and, (vi) weighted SBP-, DBP- & CKD-PRS plus covariates.

## Figure S5: Pairwise scatterplot between SBP-, DBP-, and CKD-PRS


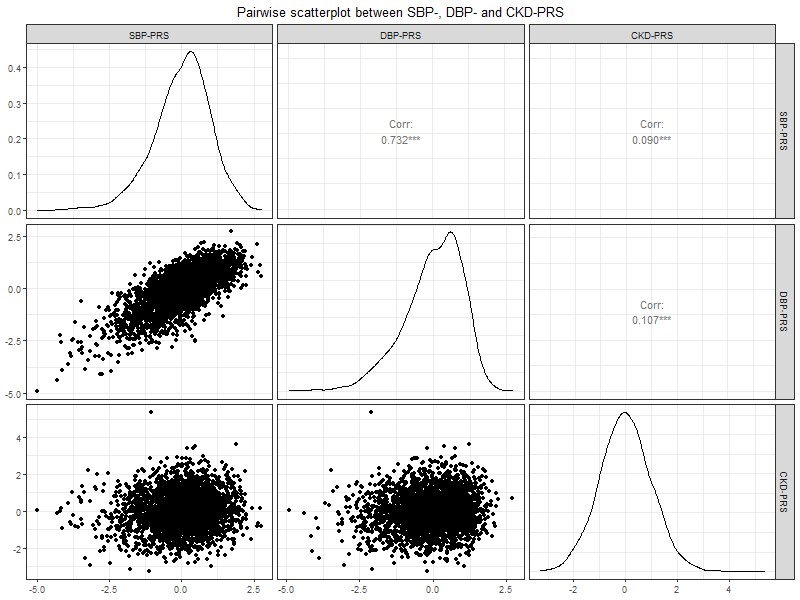


Figure *S5*. Pairwise scatterplot between SBP-, DBP-, and CKD-PRS.

# Supplementary Tables

## Table S1. Baseline characteristics stratified by HT

| **Table S****1. Baseline characteristics of the JHS study participants stratified by HT.** | | | |
| --- | --- | --- | --- |
|  | **Without HT (N = 1,206)** | **With HT (N = 1,789)** | **p-value** |
| **Age (years)**, Mean (SD) | 47.57 (11.99) | 59.30 (11.17) | <0.001 |
| **Male**, n (%) | 507 (42.0) | 638 (35.7) | <0.001 |
| **Income**, Mean (SD) | 2.93 (1.02) | 2.69 (1.02) | <0.001 |
| **Current smoker** |  |  | 0.016 |
| No, n (%) | 1005 (83.3) | 1558 (87.1) |  |
| Yes, n (%) | 190 (15.8) | 217 (12.1) |  |
| Missing, n (%) | 11 (0.9) | 14 (0.8) |  |
| **Alcohol consumption** |  |  | <0.001 |
| No, n (%) | 497 (41.2) | 1064 (59.5) |  |
| Yes, n (%) | 701 (58.1) | 717 (40.1) |  |
| Missing, n (%) | 8 (0.7) | 8 (0.4) |  |
| **Active Index**, Mean (SD) | 2.13 (0.78) | 2.02 (0.80) | <0.001 |
| **BMI (kg/m2)**, Mean (SD) | 30.87 (7.43) | 32.78 (7.36) | <0.001 |
| **BMI Categories** |  |  | <0.001 |
| Normal Weight, n (%) | 216 (17.9) | 177 (9.9) |  |
| Obese, n (%) | 553 (45.9) | 1071 (59.9) |  |
| Overweight, n (%) | 433 (35.9) | 530 (29.6) |  |
| Underweight, n (%) | 4 (0.3) | 7 (0.4) |  |
| Missing, n (%) | 0 (0.0) | 4 (0.2) |  |
| **Diabetes** |  |  | <0.001 |
| No, n (%) | 1076 (89.2) | 1203 (67.2) |  |
| Yes, n (%) | 130 (10.8) | 584 (32.6) |  |
| Missing, n (%) | 0 (0.0) | 2 (0.1) |  |
| **ACR**, Mean (SD) | 14.28 (70.68) | 84.73 (372.73) | <0.001 |
| **Albuminuria** |  |  | <0.001 |
| No, n (%) | 640 (53.1) | 625 (34.9) |  |
| Yes, n (%) | 36 (3.0) | 167 (9.3) |  |
| Missing, n (%) | 530 (43.9) | 997 (55.7) |  |
| **eGFR**, Mean (SD) | 103.39 (18.38) | 88.52 (22.93) | <0.001 |
| **Dialysis Ever** |  |  | 0.061 |
| No, n (%) | 1188 (98.5) | 1762 (98.5) |  |
| Yes, n (%) | 2 (0.2) | 12 (0.7) |  |
| Missing, n (%) | 16 (1.3) | 15 (0.8) |  |
| **BP meds** |  |  | <0.001 |
| No, n (%) | 1185 (98.3) | 209 (11.7) |  |
| Yes, n (%) | 0 (0.0) | 1577 (88.1) |  |
| Missing, n (%) | 21 (1.7) | 3 (0.2) |  |
| **BP meds, self-reported** |  |  | <0.001 |
| No, n (%) | 1178 (97.7) | 278 (15.5) |  |
| Yes, n (%) | 0 (0.0) | 1482 (82.8) |  |
| Missing, n (%) | 28 (2.3) | 29 (1.6) |  |
| **SBP**, Mean (SD) | 118.63 (10.40) | 133.26 (17.46) | <0.001 |
| **DBP**, Mean (SD) | 74.33 (7.34) | 76.97 (9.53) | <0.001 |
| **CKD (yes)**, n (%) | 47 (3.9) | 311 (17.4) | <0.001 |

## Table S2. Deciles of CKD-PRS with CKD

| Table S2. Association of top-relative-to-bottom decile of CKD-PRS with CKD in the Jackson Heart Study. | | | |
| --- | --- | --- | --- |
| **PRS Decile** | **OR**a | **95% CI** | **P value** |
| 1 | 1.00 | ref | ref |
| 2 | 0.61 | 0.31, 1.18 | 0.159 |
| 3 | 0.58 | 0.30, 1.11 | 0.110 |
| 4 | 0.96 | 0.52, 1.74 | 0.886 |
| 5 | 1.08 | 0.60, 1.95 | 0.805 |
| 6 | 1.25 | 0.71, 2.23 | 0.455 |
| 7 | 1.72 | 1.00, 3.01 | 0.059 |
| 8 | 2.15 | 1.27, 3.70 | **0.006** |
| 9 | 2.36 | 1.41, 4.04 | **0.002** |
| 10 | 4.44 | 2.73, 7.45 | **<0.001** |
| aModel adjusted for age, sex and first ten principal components. | | | |

## Table S3. Deciles of CKD-PRS with HT

| Table S3. Association of top-relative-to-bottom decile of CKD-PRS with HT in the Jackson Heart Study. | | | |
| --- | --- | --- | --- |
| **PRS Decile** | **OR**a | **95% CI** | **P value** |
| 1 | 1.00 | ref | ref |
| 2 | 1.38 | 0.96, 2.00 | 0.085 |
| 3 | 1.07 | 0.74, 1.55 | 0.713 |
| 4 | 0.98 | 0.68, 1.41 | 0.928 |
| 5 | 1.18 | 0.82, 1.71 | 0.380 |
| 6 | 1.00 | 0.69, 1.43 | 0.984 |
| 7 | 1.08 | 0.75, 1.55 | 0.687 |
| 8 | 1.36 | 0.94, 1.96 | 0.112 |
| 9 | 1.33 | 0.92, 1.93 | 0.138 |
| 10 | 1.66 | 1.14, 2.42 | **0.009** |
| aModel adjusted for age, sex and first ten principal components. | | | |

## Table S4. Deciles of CKD-PRS with SBP

| Table S4. Association of top-relative-to-bottom decile of CKD-PRS with SBP in the Jackson Heart Study. | | | |
| --- | --- | --- | --- |
| **PRS Decile** | **β**a | **95% CI** | **P value** |
| 1 | 1.00 | ref | ref |
| 2 | 1.53 | -1.29, 4.35 | 0.287 |
| 3 | -1.00 | -3.82, 1.82 | 0.486 |
| 4 | 1.85 | -0.97, 4.68 | 0.198 |
| 5 | 2.09 | -0.74, 4.91 | 0.148 |
| 6 | 0.84 | -1.99, 3.66 | 0.562 |
| 7 | 0.92 | -1.91, 3.76 | 0.523 |
| 8 | 2.45 | -0.38, 5.28 | 0.090 |
| 9 | 1.84 | -0.99, 4.68 | 0.202 |
| 10 | 2.02 | -0.82, 4.85 | 0.163 |
| aModel adjusted for age, sex and first ten principal components. | | | |

## Table S5. Deciles of CKD-PRS with DBP

| Table S5. Association of top-relative-to-bottom decile of CKD-PRS with DBP in the Jackson Heart Study | | | |
| --- | --- | --- | --- |
| **PRS Decile** | **β**a | **95% CI** | **P value** |
| 1 | 1.00 | ref | ref |
| 2 | 0.50 | -1.09, 2.10 | 0.537 |
| 3 | -0.37 | -1.97, 1.23 | 0.650 |
| 4 | 0.37 | -1.23, 1.97 | 0.653 |
| 5 | 0.65 | -0.95, 2.26 | 0.423 |
| 6 | 0.36 | -1.24, 1.96 | 0.663 |
| 7 | 0.27 | -1.34, 1.88 | 0.741 |
| 8 | 2.13 | 0.53, 3.73 | **0.009** |
| 9 | 0.15 | -1.46, 1.75 | 0.859 |
| 10 | 1.36 | -0.24, 2.97 | 0.097 |
| aModel adjusted for age, sex and first ten principal components. | | | |

## Table S6. Deciles of SBP-PRS with CKD

| Table S6. Association of top-relative-to-bottom decile of SBP-PRS with CKD in the Jackson Heart Study. | | | |
| --- | --- | --- | --- |
| **PRS Decile** | **OR**a | **95% CI** | **P value** |
| 1 | 1.00 | ref | ref |
| 2 | 0.85 | 0.51, 1.42 | 0.543 |
| 3 | 0.79 | 0.46, 1.35 | 0.389 |
| 4 | 0.76 | 0.44, 1.31 | 0.337 |
| 5 | 0.71 | 0.41, 1.25 | 0.240 |
| 6 | 0.99 | 0.58, 1.70 | 0.966 |
| 7 | 0.91 | 0.53, 1.56 | 0.735 |
| 8 | 0.91 | 0.52, 1.59 | 0.749 |
| 9 | 0.75 | 0.42, 1.32 | 0.326 |
| 10 | 1.12 | 0.65, 1.92 | 0.697 |
| aModel adjusted for age, sex and first ten principal components. | | | |

## Table S7. Deciles of SBP-PRS with HT

| Table S7. Association of top-relative-to-bottom decile of SBP-PRS with HT in the Jackson Heart Study. | | | |
| --- | --- | --- | --- |
| **PRS Decile** | **OR**a | **95% CI** | **P value** |
| 1 | 1.00 | ref | ref |
| 2 | 1.61 | 1.10, 2.36 | **0.018** |
| 3 | 1.77 | 1.20, 2.61 | **0.005** |
| 4 | 2.50 | 1.68, 3.73 | **<0.001** |
| 5 | 1.99 | 1.33, 2.98 | **0.001** |
| 6 | 2.59 | 1.72, 3.91 | **<0.001** |
| 7 | 3.23 | 2.14, 4.90 | **<0.001** |
| 8 | 3.81 | 2.50, 5.82 | **<0.001** |
| 9 | 4.12 | 2.69, 6.34 | **<0.001** |
| 10 | 5.12 | 3.32, 7.93 | **<0.001** |
| aModel adjusted for age, sex and first ten principal components. | | | |

## Table S8. Deciles of SBP-PRS with SBP

| Table S8. Association of top-relative-bottom decile of SBP-PRS with SBP in the Jackson Heart Study. | | | |
| --- | --- | --- | --- |
| **PRS Decile** | **β**a | **95% CI** | **P value** |
| 1 | 1.00 | ref | ref |
| 2 | 4.20 | 1.37, 7.02 | **0.004** |
| 3 | 5.39 | 2.49, 8.30 | **<0.001** |
| 4 | 7.02 | 4.07, 9.97 | **<0.001** |
| 5 | 7.80 | 4.80, 10.81 | **<0.001** |
| 6 | 9.52 | 6.49, 12.55 | **<0.001** |
| 7 | 9.89 | 6.87, 12.91 | **<0.001** |
| 8 | 10.86 | 7.79, 13.94 | **<0.001** |
| 9 | 12.24 | 9.15, 15.33 | **<0.001** |
| 10 | 16.51 | 13.43, 19.60 | **<0.001** |
| aModel adjusted for age, sex and first ten principal components. | | | |

## Table S9. Deciles of SBP-PRS with DBP

| Table S9. Association of top-relative-to-bottom decile of SBP-PRS with DBP in the Jackson Heart Study. | | | |
| --- | --- | --- | --- |
| **PRS Decile** | **β**a | **95% CI** | **P value** |
| 1 | 1.00 | ref | ref |
| 2 | 1.90 | 0.28, 3.52 | **0.029** |
| 3 | 2.81 | 1.15, 4.47 | **0.001** |
| 4 | 3.36 | 1.67, 5.04 | **<0.001** |
| 5 | 3.65 | 1.93, 5.37 | **<0.001** |
| 6 | 3.96 | 2.22, 5.70 | **<0.001** |
| 7 | 4.75 | 3.02, 6.48 | **<0.001** |
| 8 | 5.42 | 3.66, 7.18 | **<0.001** |
| 9 | 5.94 | 4.17, 7.72 | **<0.001** |
| 10 | 6.66 | 4.89, 8.43 | **<0.001** |
| aModel adjusted for age, sex and first ten principal components. | | | |

## Table S10. Deciles of DBP-PRS with CKD

| Table S10. Association of top-relative-to-bottom decile of DBP-PRS with CKD in the Jackson Heart Study. | | | |
| --- | --- | --- | --- |
| **PRS Decile** | **OR**a | **95% CI** | **P value** |
| 1 | 1.00 | ref | ref |
| 2 | 0.57 | 0.33, 0.96 | **0.037** |
| 3 | 0.68 | 0.41, 1.14 | 0.158 |
| 4 | 0.52 | 0.30, 0.89 | **0.017** |
| 5 | 0.85 | 0.51, 1.41 | 0.525 |
| 6 | 0.77 | 0.46, 1.30 | 0.335 |
| 7 | 0.57 | 0.32, 0.99 | **0.046** |
| 8 | 0.50 | 0.28, 0.88 | **0.018** |
| 9 | 0.57 | 0.32, 0.99 | **0.047** |
| 10 | 0.83 | 0.49, 1.42 | 0.493 |
| aModel adjusted for age, sex and first ten principal components. | | | |

## Table S11. Deciles of DBP-PRS with HT

| Table S11. Association of top-relative-to-bottom decile of DBP-PRS with HT in the Jackson Heart Study. | | | |
| --- | --- | --- | --- |
| **PRS Decile** | **OR**a | **95% CI** | **P value** |
| 1 | 1.00 | ref | ref |
| 2 | 1.38 | 0.95, 2.01 | 0.109 |
| 3 | 1.45 | 0.99, 2.12 | 0.066 |
| 4 | 1.30 | 0.88, 1.91 | 0.189 |
| 5 | 1.10 | 0.75, 1.63 | 0.637 |
| 6 | 1.43 | 0.96, 2.14 | 0.090 |
| 7 | 1.89 | 1.26, 2.84 | **0.004** |
| 8 | 1.90 | 1.26, 2.88 | **0.003** |
| 9 | 2.91 | 1.91, 4.46 | **<0.001** |
| 10 | 3.09 | 2.02, 4.76 | **<0.001** |
| aModel adjusted for age, sex and first ten principal components. | | | |

## Table S12. Deciles of DBP-PRS with SBP

| Table S12. Association of top-relative-to-bottom decile of DBP-PRS with SBP in the Jackson Heart Study. | | | |
| --- | --- | --- | --- |
| **PRS Decile** | **β**a | **95% CI** | **P value** |
| 1 | 1.00 | ref | ref |
| 2 | 3.05 | 0.18, 5.91 | **0.037** |
| 3 | 3.11 | 0.20, 6.02 | **0.036** |
| 4 | 2.82 | -0.15, 5.778 | 0.062 |
| 5 | 2.64 | -0.35, 5.63 | 0.083 |
| 6 | 3.79 | 0.73, 6.85 | **0.015** |
| 7 | 6.23 | 3.15, 9.32 | **<0.001** |
| 8 | 6.65 | 3.53, 9.78 | **<0.001** |
| 9 | 7.98 | 4.85, 11.12 | **<0.001** |
| 10 | 10.90 | 7.74, 14.06 | **<0.001** |
| aModel adjusted for age, sex and first ten principal components. | | | |

## Table S13. Deciles of DBP-PRS with DBP

| Table S13. Association of top-relative-to-bottom decile of DBP-PRS with DBP in the Jackson Heart Study. | | | |
| --- | --- | --- | --- |
| **PRS Decile** | **β**a | **95% CI** | **P value** |
| 1 | 1.00 | ref | ref |
| 2 | 1.31 | -0.30, 2.92 | 0.111 |
| 3 | 1.79 | 0.16, 3.41 | **0.032** |
| 4 | 2.00 | 0.34, 3.66 | **0.018** |
| 5 | 2.71 | 1.04, 4.39 | **0.002** |
| 6 | 3.25 | 1.53, 4.96 | **<0.001** |
| 7 | 4.23 | 2.50, 5.96 | **<0.001** |
| 8 | 4.86 | 3.11, 6.61 | **<0.001** |
| 9 | 6.57 | 4.81, 8.33 | **<0.001** |
| 10 | 8.43 | 6.65, 10.20 | **<0.001** |
| aModel adjusted for age, sex and first ten principal components. | | | |

## Table S14. Associations of PRS with CKD outcome in JHS with AUC

| Table S14. Associations of PRS with **CKD** outcome in the Jackson Heart Study. | | | | | | |
| --- | --- | --- | --- | --- | --- | --- |
| **PRS** | **ORa (95% CI)** | **P value** | **AUC (95% CI)b** |  |  |  |
| Covariates only model | - | - | 0.667 (0.606 - 0.728) |  |  |  |
| SBP-PRS | 1.05 (0.91, 1.20) | 0.545 | 0.667 (0.606 - 0.729) |  |  |  |
| DBP-PRS | 0.97 (0.84, 1.12) | 0.688 | 0.666 (0.604 - 0.727) |  |  |  |
| SBP- (& DBP-PRS) | 1.10 (0.93, 1.31) | 0.260 | 0.668 (0.606 - 0.729) |  |  |  |
| (SBP- &) DBP-PRS | 0.91 (0.76, 1.09) | 0.302 | - |  |  |  |
| CKD-PRS | **1.85** (1.64, 2.09) | <0.001 | 0.728 (0.668 - 0.782) |  |  |  |
| (SBP-, DBP- &) CKD-PRS | **1.85** (1.64, 2.09) | <0.001 | 0.725 (0.664 - 0.786) |  |  |  |
| aModel adjusted for age, sex and first 10 ancestry principal components. | | | | | | |
| bDeLong 95% CI | | | | | | |
| The OR are reported for the PRS outside the brackets. | | | | | | |

## Table S15. Associations of PRS with HT outcome in JHS with AUC

| Table 15. Associations of PRS with **HT** outcome in the Jackson Heart Study. | | | | | | |
| --- | --- | --- | --- | --- | --- | --- |
| **PRS** | **ORa (95% CI)** | **P value** | **AUC (95% CI)b** |  |  |  |
| Covariates only model |  | - | 0.764 (0.732 - 0.796) |  |  |  |
| SBP-PRS | **1.59** (1.43, 1.77) | <0.001 | 0.775 (0.743 - 0.806) |  |  |  |
| DBP-PRS | **1.40** (1.26, 1.55) | <0.001 | 0.768 (0.737 - 0.800) |  |  |  |
| SBP- (& DBP-PRS) | **1.51** (1.33, 1.72) | <0.001 | 0.774 (0.743 - 0.805) |  |  |  |
| (SBP- &) DBP-PRS | 1.09 (0.95, 1.24) | 0.212 | - |  |  |  |
| CKD-PRS | **1.10** (1.01, 1.20) | 0.027 | 0.763 (0.730 - 0.795) |  |  |  |
| (SBP- &) CKD-PRS | 1.09(1.00, 1.18) | 0.062 | 0.773 ( 0.742-0.804) |  |  |  |
| (DBP- &) CKD-PRS | 1.09 (1.00, 1.18) | 0.060 | 0.767 (0.736-0.799) |  |  |  |
| (SBP-, DBP- &) CKD-PRS | 1.08 (1.00, 1.18) | 0.068 | 0.773 (0.741 - 0.804) |  |  |  |
| aModel adjusted for age, sex and first 10 ancestry principal components. | | | | | | |
| bDeLong 95% CI | | | | | | |
| The OR are reported for the PRS outside the brackets. | | | | | | |

## Table S16. Associations of PRS with SBP outcome in JHS with R-squared

| Table S16. Associations of PRS with **SBP** outcome in the Jackson Heart Study. | | | | |
| --- | --- | --- | --- | --- |
| **PRS** | **Beta (95% CI)a** | **P value** | **R2 (%)b** | **R2 (%)c** |  |
| Covariates only model | - | - | 21.45 | - |  |
| SBP-PRS | **4.51** (3.77, 5.25) | <0.001 | 25.04 | 3.59 |  |
| DBP-PRS | **3.02** (2.25, 3.80) | <0.001 | 22.96 | 1.51 |  |
| SBP- (& DBP-PRS) | **4.33** (3.40, 5.27) | <0.001 | 25.05 | 3.60 |  |
| (SBP- &) DBP-PRS | 0.30 (-0.66, 1.26) | 0.543 | - | - |  |
| CKD-PRS | 0.55 (-0.09, 1.19) | 0.092 | 21.52 | 0.07 |  |
| (SBP-, DBP- &) CKD-PRS | 0.41 (-0.21, 1.04) | 0.195 | 25.09 | 3.64 |  |
| aModel adjusted for age, sex and first 10 ancestry principal components. | | | | |
| bMultiple R2 of each model multiplied by 100 | | | | |
| cMultiple R2 for PRS component alone reported, calculated as difference of R2 of model with PRS(s) and R2 of covariates only model | | | | |
| **PRS:** Polygenic risk score, **CKD**: Chronic kidney disease, **HT**: Hypertension | | | | |
| The OR are reported for the PRS outside the brackets. | | | | |

## Table S17. Associations of PRS with DBP outcome in JHS with R-squared

| Table S17. Associations of PRS with **DBP** outcome in the Jackson Heart Study. | | | | |
| --- | --- | --- | --- | --- |
| **PRS** | **Beta (95% CI)** | **P value** | **R2 (%)b** | **R2 (%)c** |  |
| Covariates only model | - | - | 3.26 | - |  |
| SBP-PRS | **1.89** (1.46, 2.31) | <0.001 | 5.67 | 2.41 |  |
| DBP-PRS | **2.53** (2.10, 2.96) | <0.001 | 7.32 | 4.06 |  |
| SBP- (& DBP-PRS) | **0.63** (0.10, 1.16) | 0.020 | 7.49 | 4.23 |  |
| (SBP- &) DBP-PRS | **2.14** (1.59, 2.68) | <0.001 | - | - |  |
| CKD-PRS | **0.37** (0.01, 0.73) | 0.045 | 3.39 | 0.13 |  |
| (SBP- &) CKD-PRS | 0.32 (-0.04, 0.67) | 0.083 | 5.76 | 2.50 |  |
| (DBP- &) CKD-PRS | 0.27 (-0.09, 0.62) | 0.143 | 7.39 | 4.13 |  |
| (SBP-, DBP- &) CKD-PRS | 0.26 (-0.09, 0.62) | 0.145 | 7.55 | 4.29 |  |
| aModel adjusted for age, sex and first 10 ancestry principal components. | | | | |
| bMultiple R2 of each model multiplied by 100 | | | | |
| cMultiple R2 for PRS component alone reported, calculated as difference of R2 of model with PRS(s) and R2 of covariates only model | | | | |
| **PRS:** Polygenic risk score, **CKD**: Chronic kidney disease, **HT**: Hypertension | | | | |
| The OR are reported for the PRS outside the brackets. | | | | |

**REFERENCES**

1. Taylor HA, Jr., Wilson JG, Jones DW, et al. Toward resolution of cardiovascular health disparities in African Americans: design and methods of the Jackson Heart Study. *Ethn Dis.* 2005;15(4 Suppl 6):S6-4-17.

2. Wilson JG, Rotimi CN, Ekunwe L, et al. Study design for genetic analysis in the Jackson Heart Study. *Ethn Dis.* 2005;15(4 Suppl 6):S6-30-37.

3. Dubbert PM, Carithers T, Ainsworth BE, Taylor HA, Jr., Wilson G, Wyatt SB. Physical activity assessment methods in the Jackson Heart Study. *Ethn Dis.* 2005;15(4 Suppl 6):S6-56-61.

4. Payne TJ, Wyatt SB, Mosley TH, et al. Sociocultural methods in the Jackson Heart Study: conceptual and descriptive overview. *Ethn Dis.* 2005;15(4 Suppl 6):S6-38-48.

5. Khan A, Turchin MC, Patki A, et al. Genome-wide polygenic score to predict chronic kidney disease across ancestries. *Nature Medicine.* 2022;28(7):1412-1420.

6. Privé F, Vilhjálmsson BJ, Aschard H, Blum MGB. Making the Most of Clumping and Thresholding for Polygenic Scores. *Am J Hum Genet.* 2019;105(6):1213-1221.

7. Hellwege J, Liang J, Giri et al. African ancestry genome-wide association study of blood pressure and hypertension identifes 25 novel loci through predicted gene expression. 2022. In press.

8. Ge T, Chen C-Y, Ni Y, Feng Y-CA, Smoller JW. Polygenic prediction via Bayesian regression and continuous shrinkage priors. *Nature Communications.* 2019;10(1):1776.
